# Supplementary material for: Reproductive Biology of Fritillaria aurea Schott (Liliaceae), a Rare Species Endemic to Turkey
Source: MDPI journal article supplement (doi:10.3390/d14121052), 2022-12-01
Supplement: s1 [file s1]

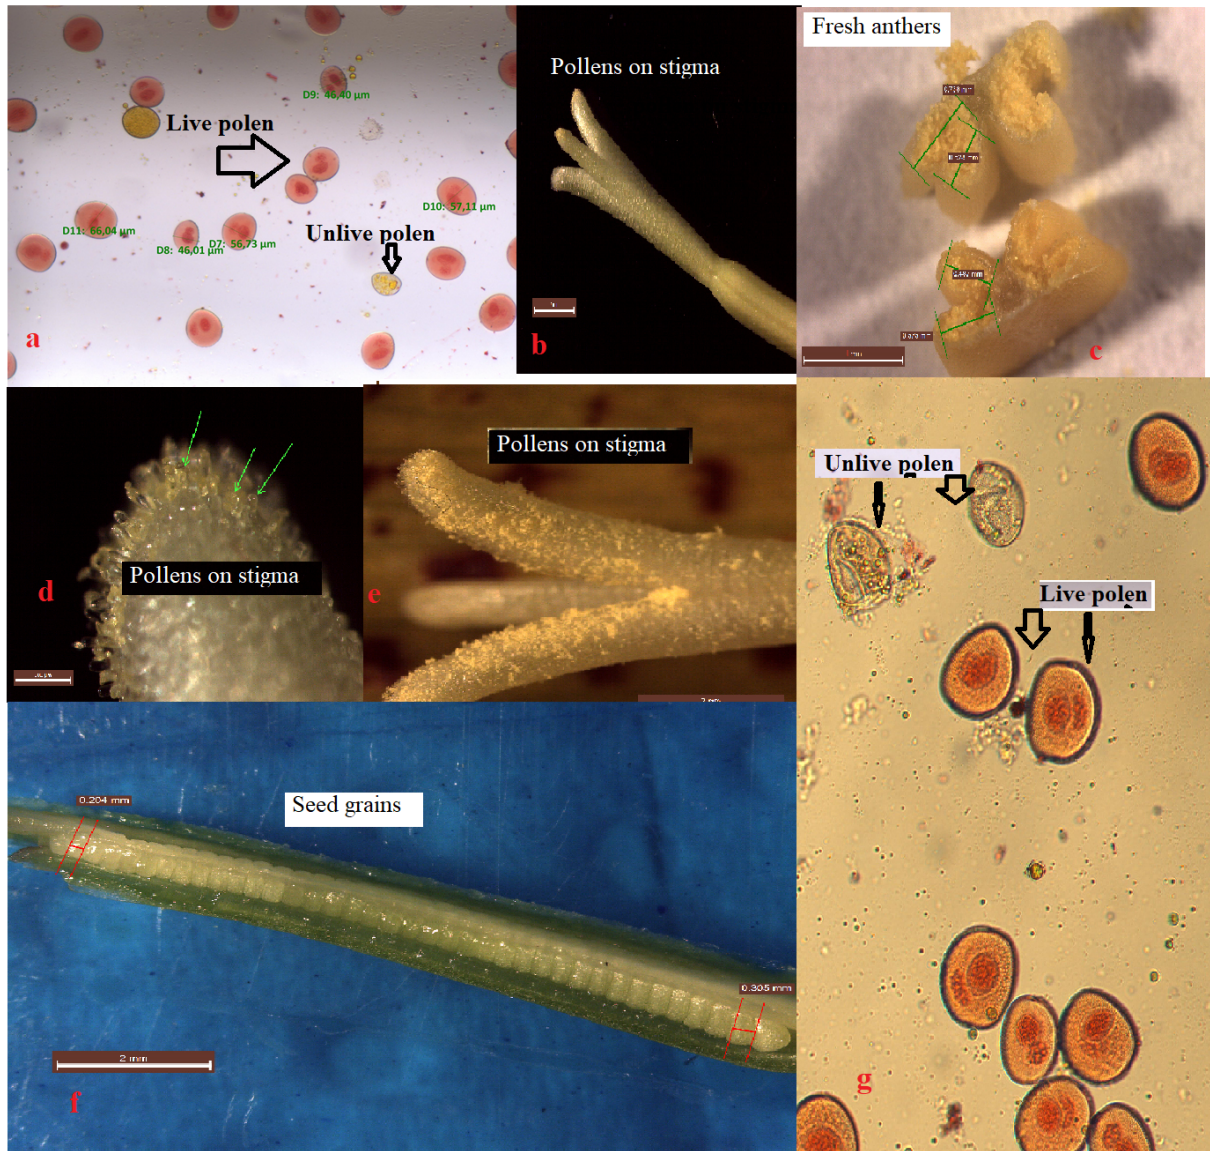

**Figure S1.** Represents images of pollen and seed studies. Live and unlive pollen samples (a,g). Pollens on stigma (b,d,e). Fresh anthers (c). Seed grains (f) (*Photo Original; F. Yıldız*).

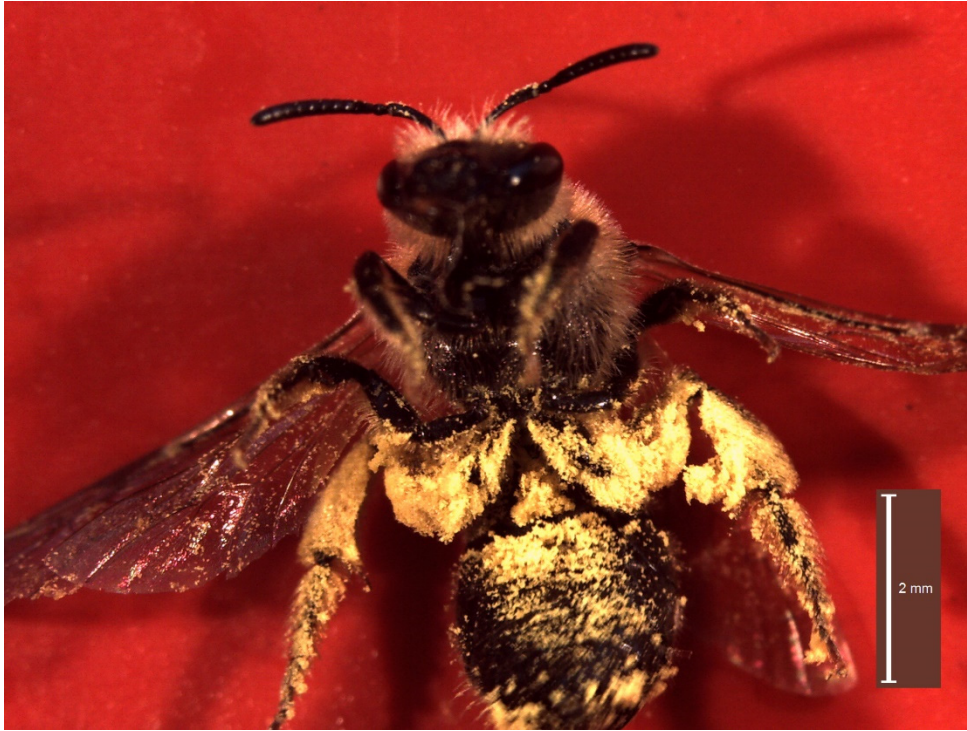

**Figure S2.** Image of pollen of the species on the surface of honey bees (*Apis mellifera*) body (*Photo Original; F. Yıldız*).
